# Supplementary material for: Sodium, potassium intake, and all-cause mortality: confusion and new findings
Source: Springer Nature journal article supplement (doi:10.1186/s12889-023-17582-8), 2024-01-15

Supplementary Figure 1. Flow chart of study participants

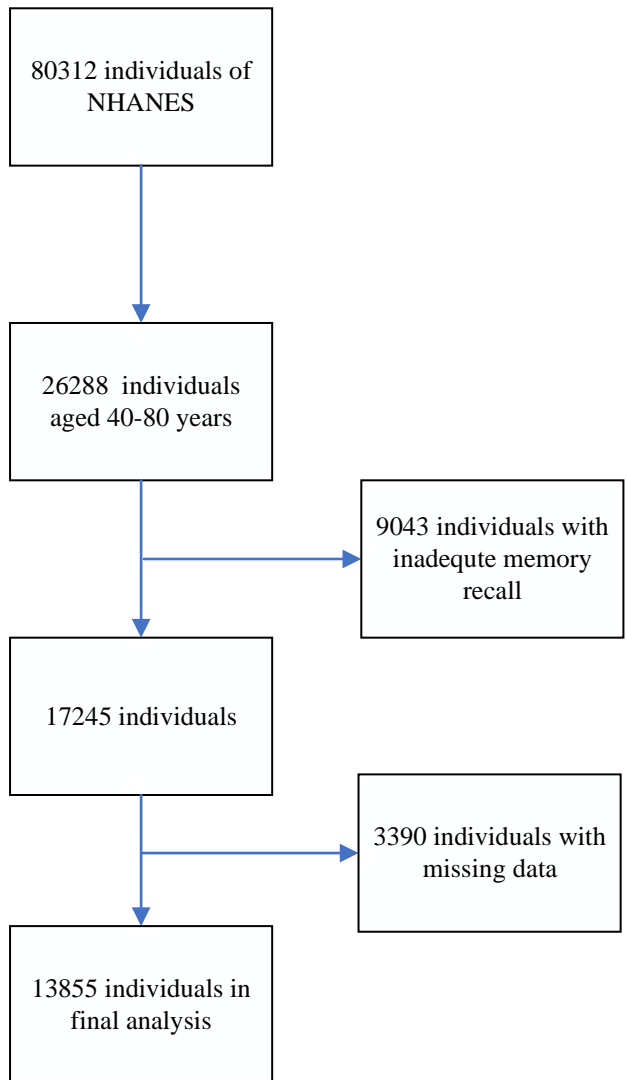

Supplement: MOESM1 [file 26629278]
