# Supplementary material for: Sodium, potassium intake, and all-cause mortality: confusion and new findings
Source: Springer Nature journal article supplement (doi:10.1186/s12889-023-17582-8), 2024-01-15
Supplement: MOESM2 [file 26629278]

Supplement Figure 2. The association between sodium intake and all-cause mortality with normal sodium intake compared to low sodium intake in each subgroups.

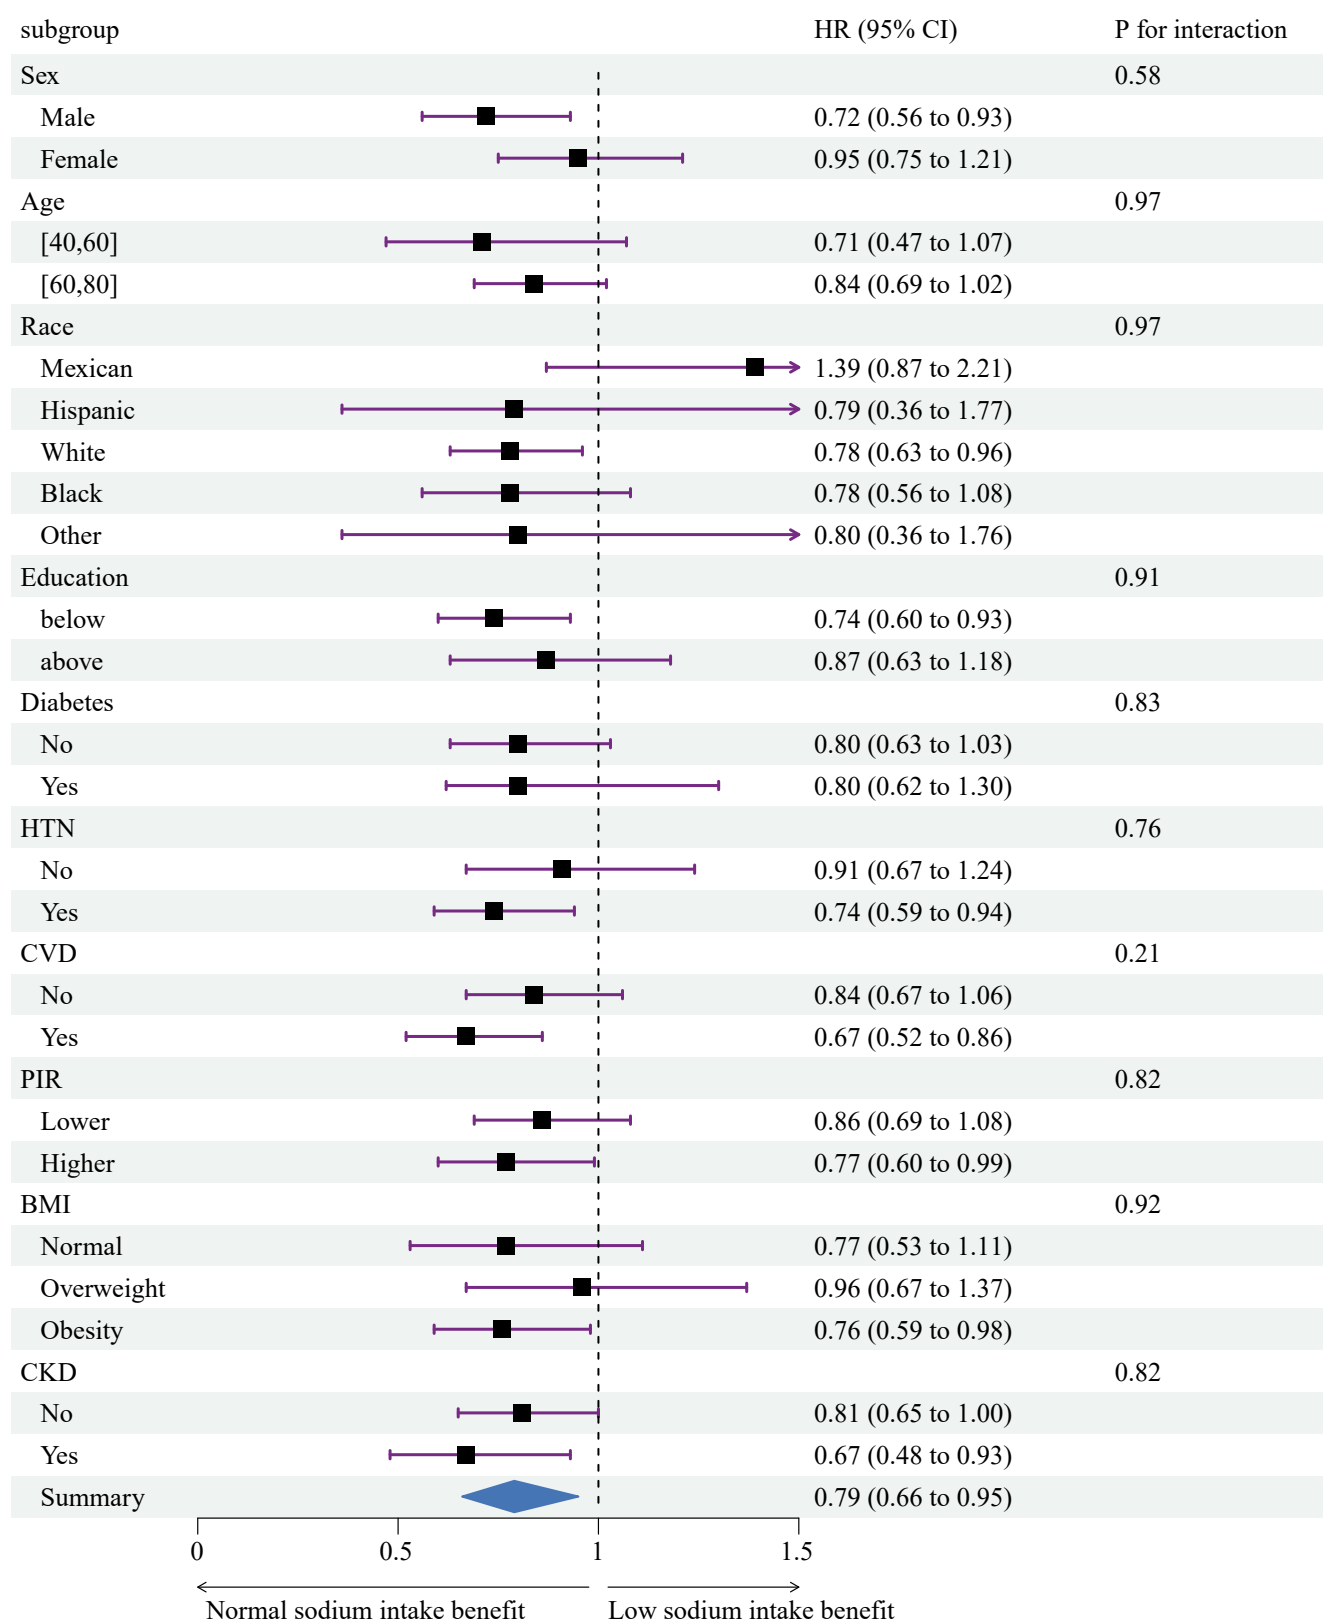

Forest plots of stratified analyses of sodium intake and all-cause mortality. all covariates except for the factor defining the subgroup were adjusted. The multicollinearity test was conducted for all variables in the models. There is a certain degree of multicollinearity ( $VIF > 10$ ) present in the populations of Mexico, Spain, and others, which may hinder the extrapolation of this conclusion to these populations.
