# Supplementary material for: Sodium, potassium intake, and all-cause mortality: confusion and new findings
Source: Springer Nature journal article supplement (doi:10.1186/s12889-023-17582-8), 2024-01-15

The Relationship Between The Sodium Intake And The All-cause Mortality

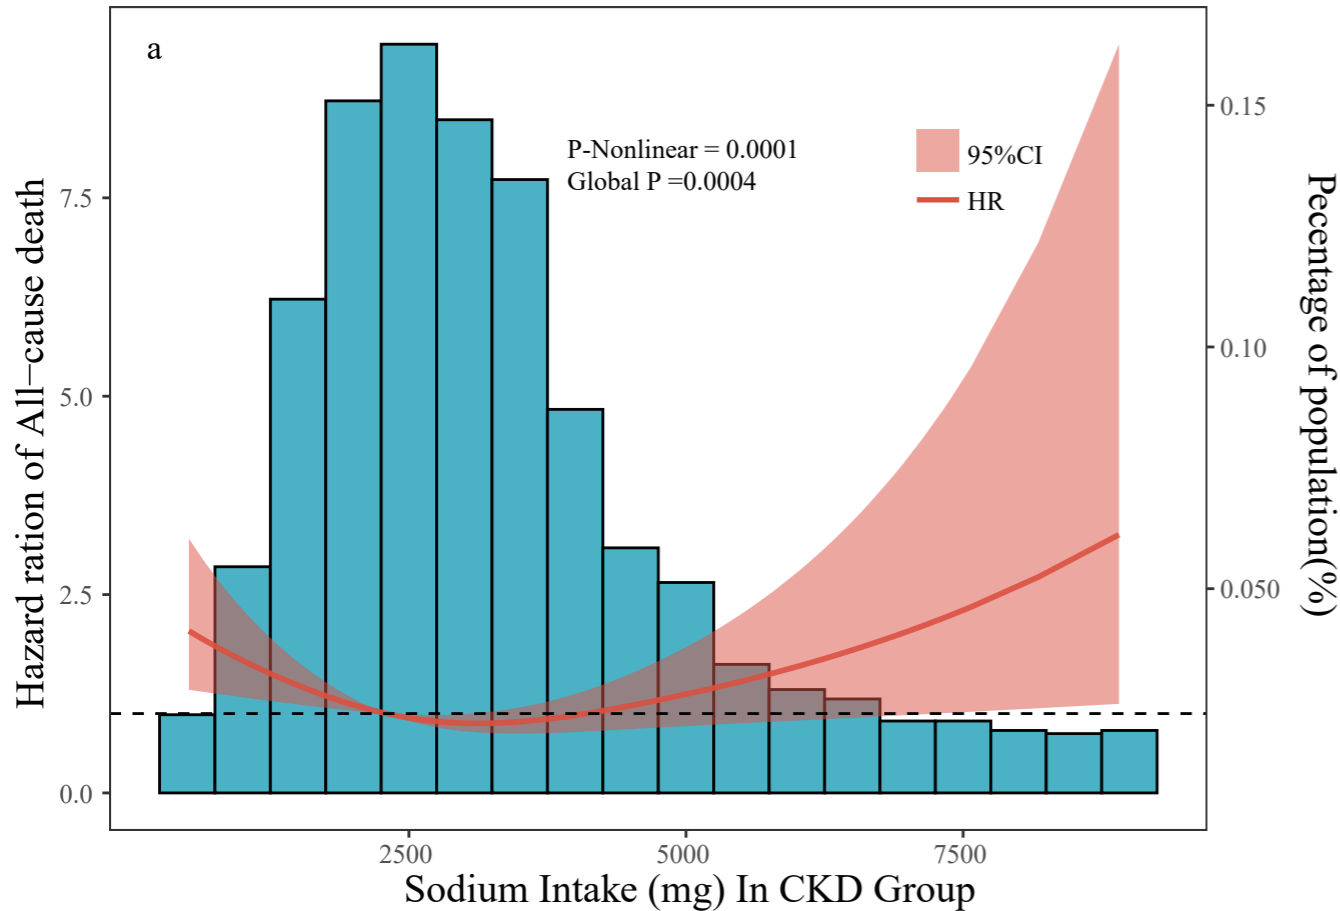

The Relationship Between The Sodium Intake And The All-cause Mortality

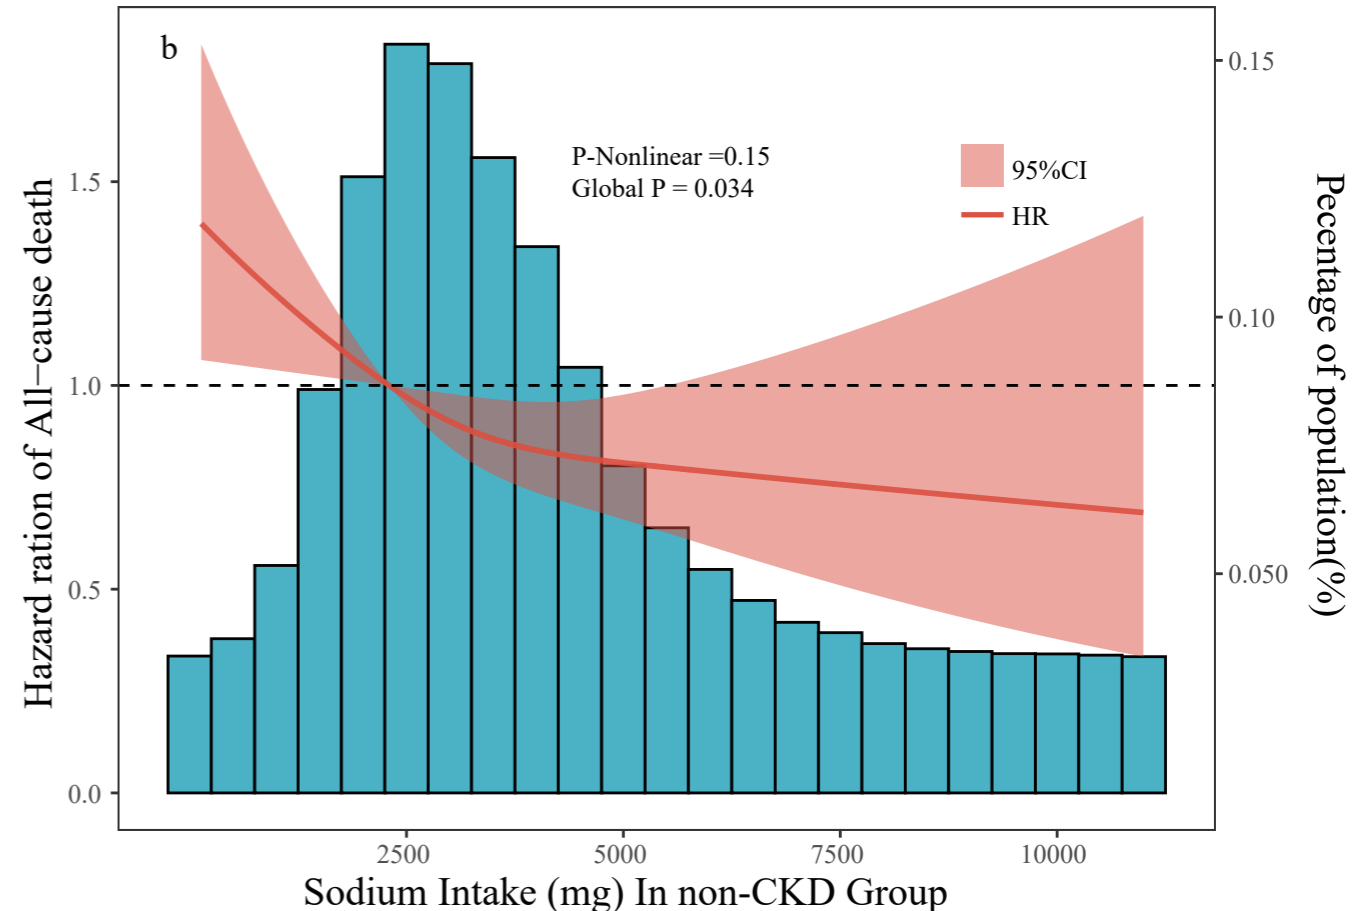

Supplement: MOESM8 [file 26629278]
